# Supplementary material for: Radiosynthesis and Preclinical Evaluation of an 18F-Labeled Triazolopyridopyrazine-Based Inhibitor for Neuroimaging of the Phosphodiesterase 2A (PDE2A)
Source: MDPI journal article supplement (doi:10.3390/ph15101272), 2022-10-15
Supplement: s1 [file s1]

## Supplementary Materials

to

### **Radiosynthesis and preclinical evaluation of an $^{18}\text{F}$ -labeled triazolopyridopyrazine-based inhibitor for neuroimaging of the phosphodiesterase 2A (PDE2A)**

Barbara Wenzel <sup>1</sup>, Stefan R. Fritzsche <sup>2</sup>, Magali Toussaint <sup>1</sup>, Detlef Briel <sup>2</sup>, Klaus Kopka <sup>1,3</sup>, Peter Brust <sup>1</sup>, Matthias Scheunemann <sup>1</sup> and Winnie Deuther-Conrad <sup>1</sup>

<sup>1</sup> Department of Neuroradiopharmaceuticals, Institute of Radiopharmaceutical Cancer Research, Helmholtz-Zentrum Dresden-Rossendorf, Leipzig, Germany;

<sup>2</sup> Institute for Drug Discovery, Faculty of Medicine, Leipzig University, Leipzig, Germany;

<sup>3</sup> Faculty of Chemistry and Food Chemistry, School of Science, Technical University Dresden, Dresden, Germany;

Content:

1) NMR and mass spectra of inhibitor **11** and precursor compounds **13** and **19**

2) Radio- and UV-HPLC chromatograms of

i) semi-preparative separation of [ $^{18}\text{F}$ ]**11** and

ii) final product [ $^{18}\text{F}$ ]**11**

3) Biodistribution data of [ $^{18}\text{F}$ ]**11** in mouse

# 1) NMR and mass spectra of inhibitor 11 and precursor compounds 13 and 19

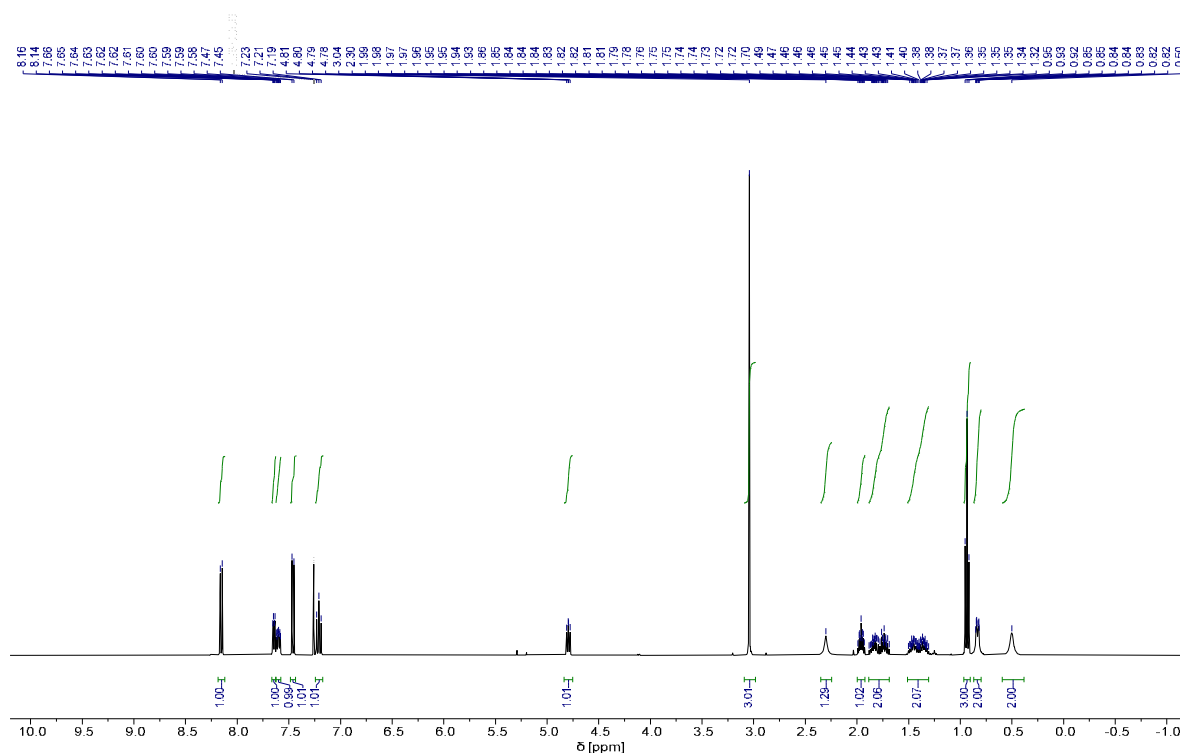

**Figure S1:** <sup>1</sup>H NMR spectrum (400 MHz, CDCl<sub>3</sub>) of 11

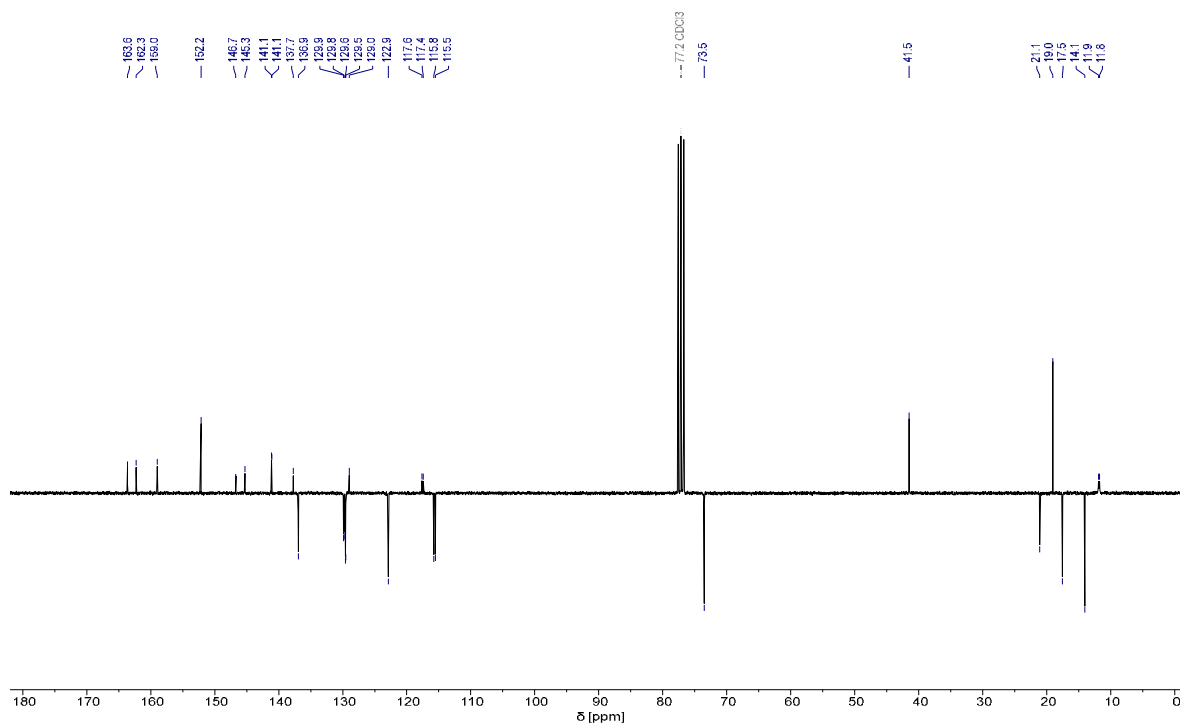

**Figure S2:** <sup>13</sup>C NMR spectrum (75 MHz, CDCl<sub>3</sub>) of 11

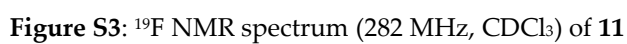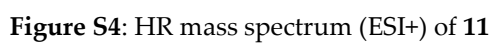

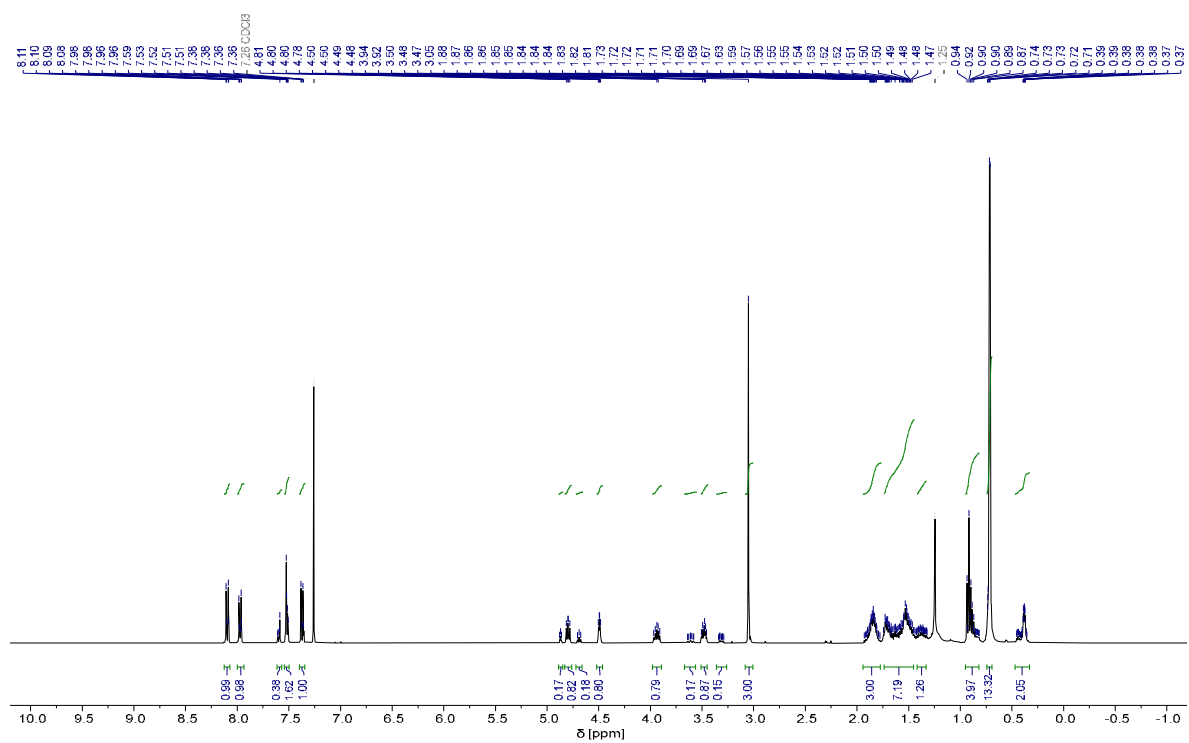

Figure S5: <sup>1</sup>H NMR spectrum (400 MHz, CDCl<sub>3</sub>) of **13** (diastereomers)

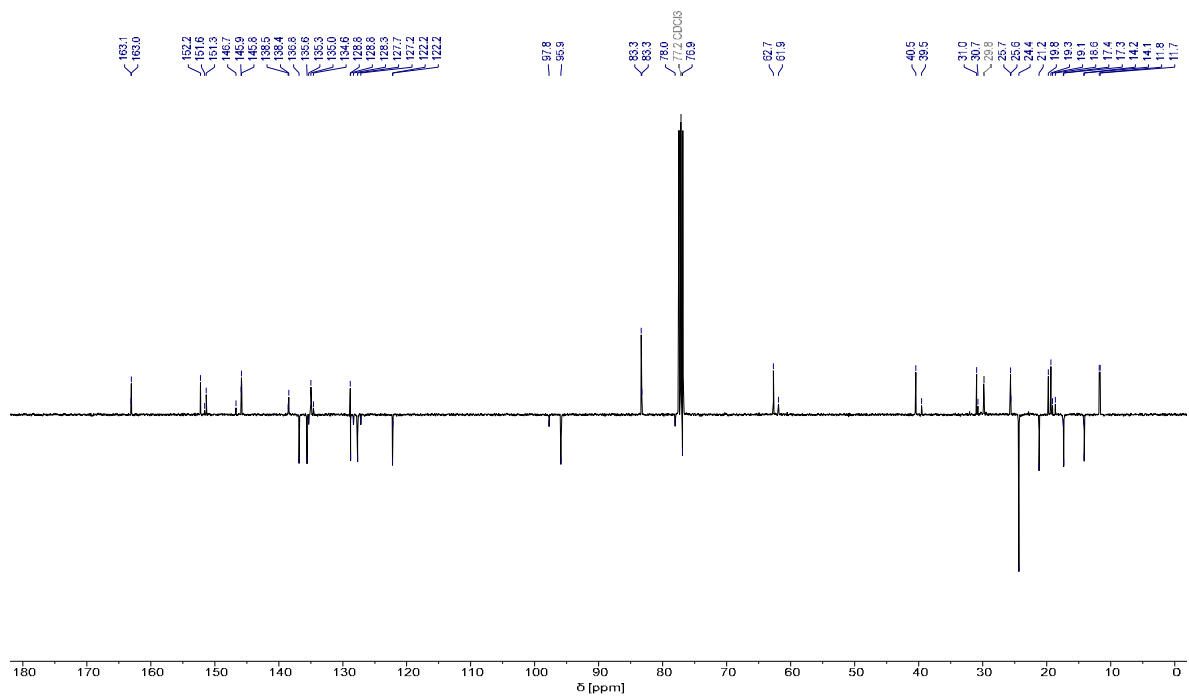

Figure S6: <sup>13</sup>C NMR spectrum (101 MHz, CDCl<sub>3</sub>) of **13** (diastereomers)

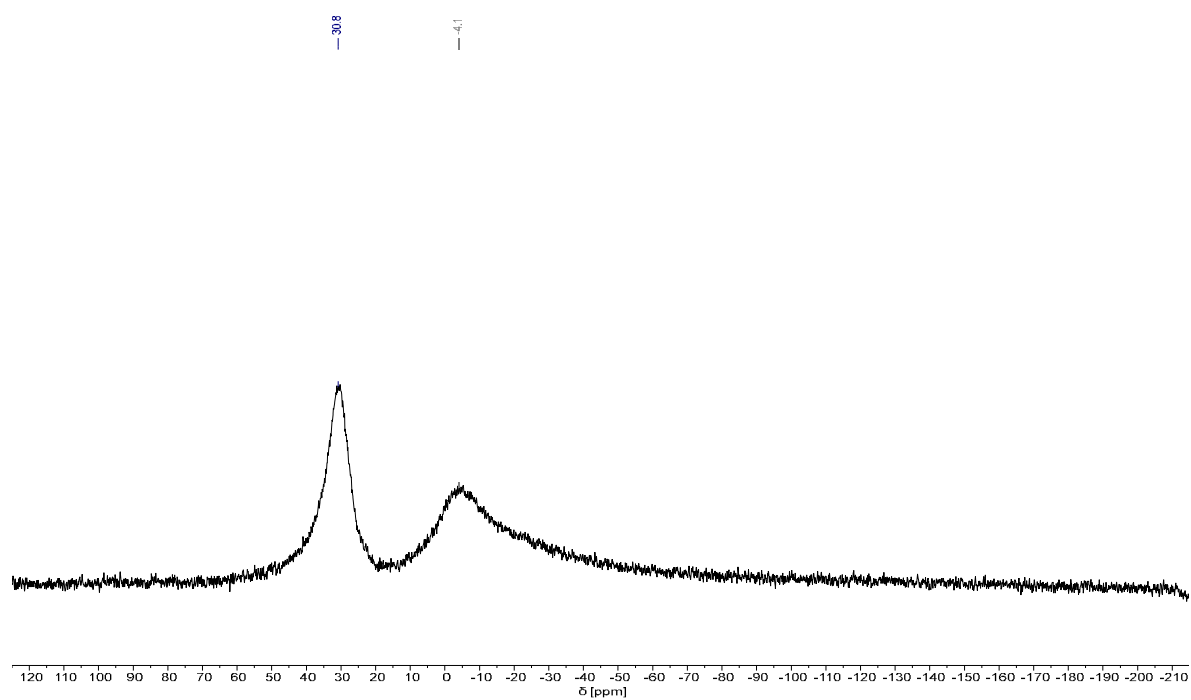

**Figure S7:** <sup>11</sup>B NMR spectrum (128 MHz, CDCl<sub>3</sub>) of **13** (diastereomers)

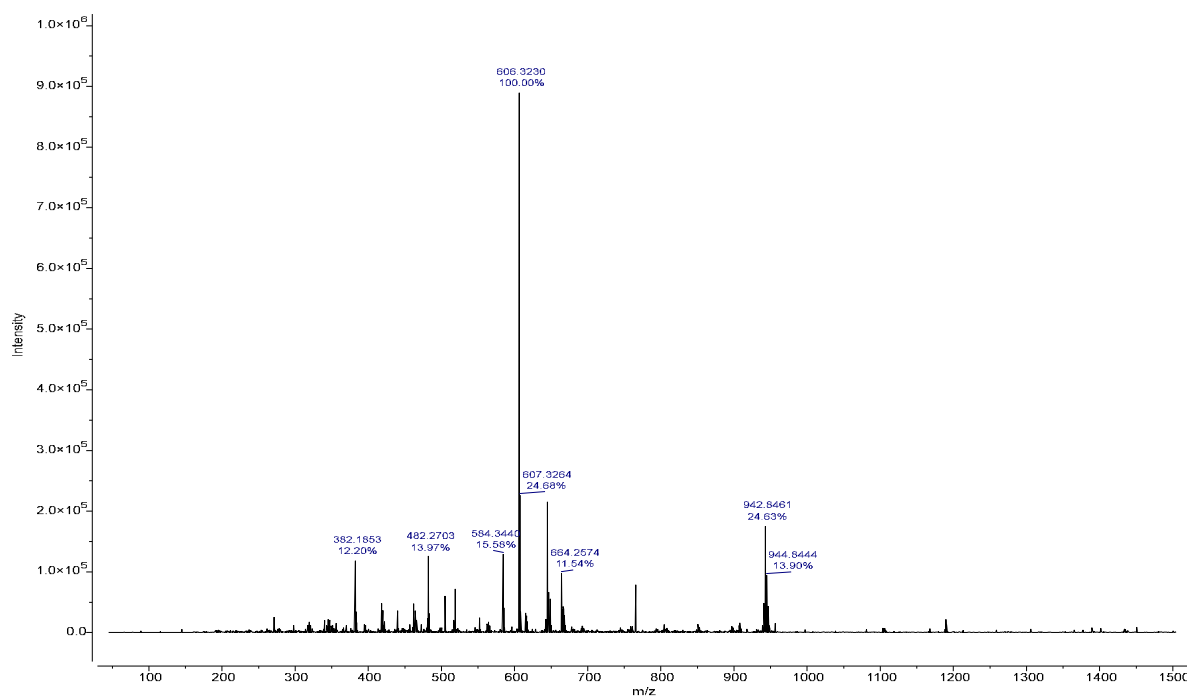

**Figure S8:** HR mass spectrum (ESI+) of **13**

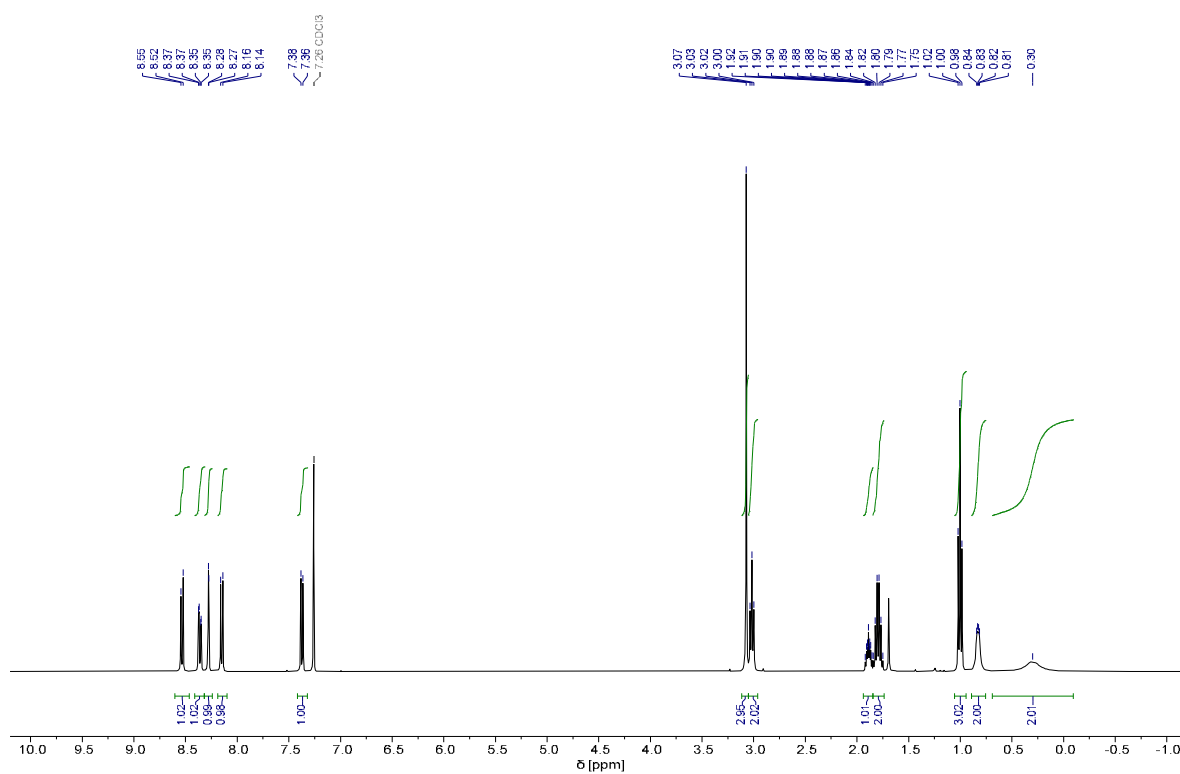

**Figure S9:**  $^1\text{H}$  NMR spectrum (400 MHz,  $\text{CDCl}_3$ ) of **19**

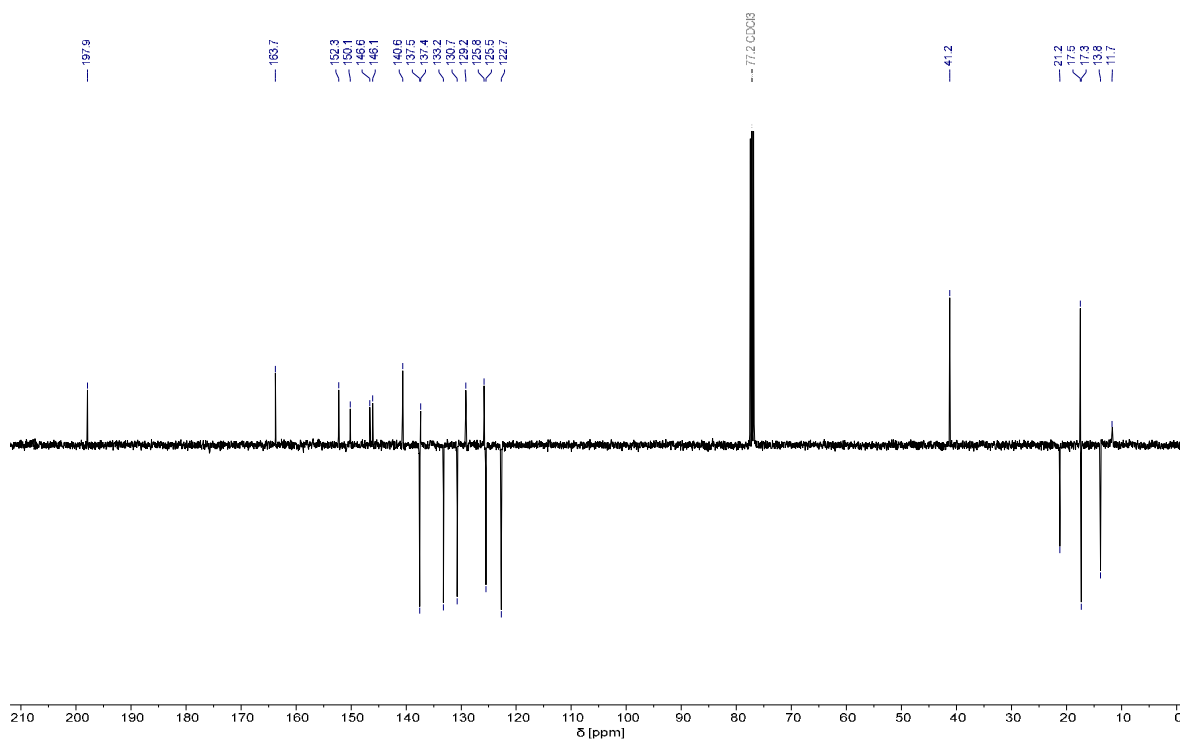

**Figure S10:**  $^{13}\text{C}$  NMR spectrum (101 MHz,  $\text{CDCl}_3$ ) of **19**

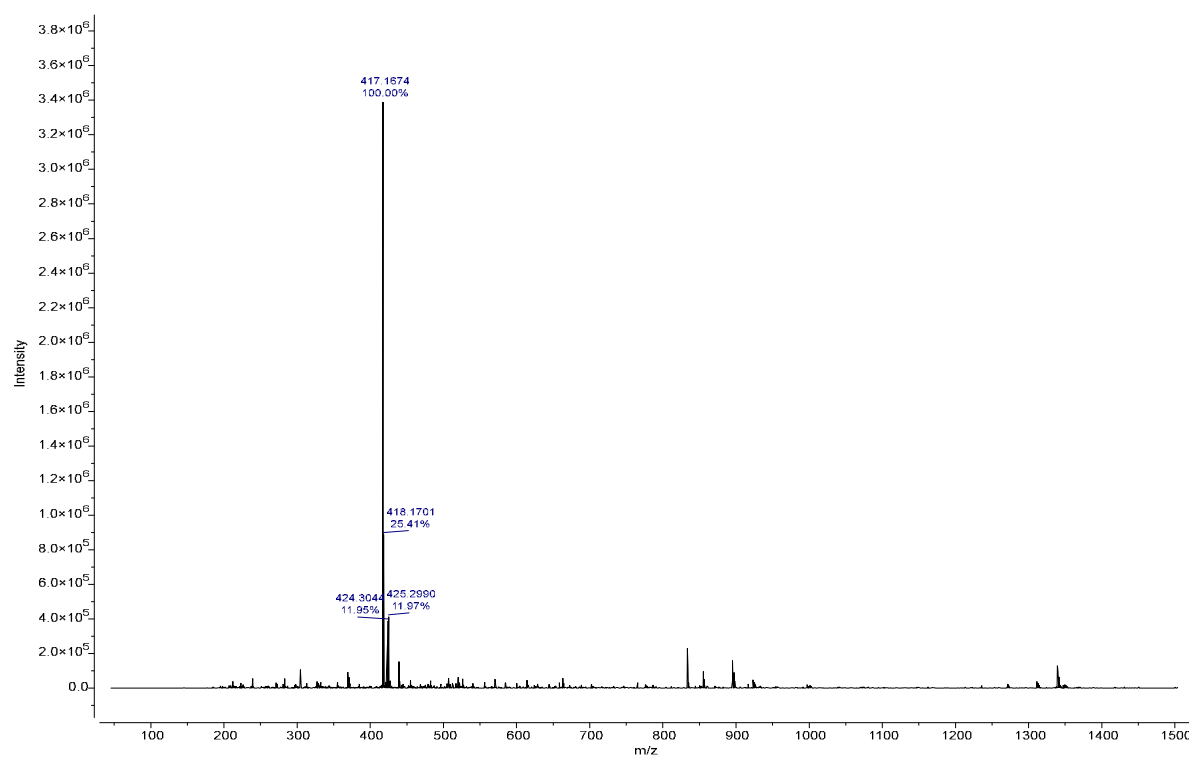

**Figure S11:** HR mass spectrum (ESI+) of **19**

## 2) Radio- and UV-HPLC chromatograms of [ $^{18}\text{F}$ ]11

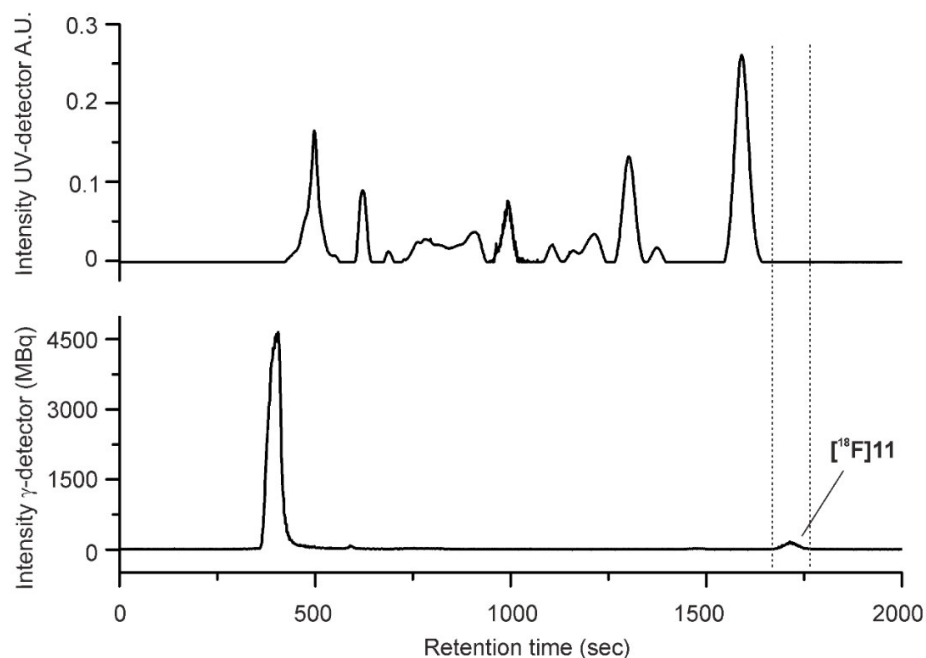

**Figure S12.** Exemplary UV- and radio-chromatogram of the semi-preparative HPLC separation of [ $^{18}\text{F}$ ]11. Conditions: Reprosil-Pur C18 AQ (250  $\times$  20 mm), 50% ACN/20 mM  $\text{NH}_4\text{OAc}_{\text{aq}}$ , flow 6.5 mL/min.

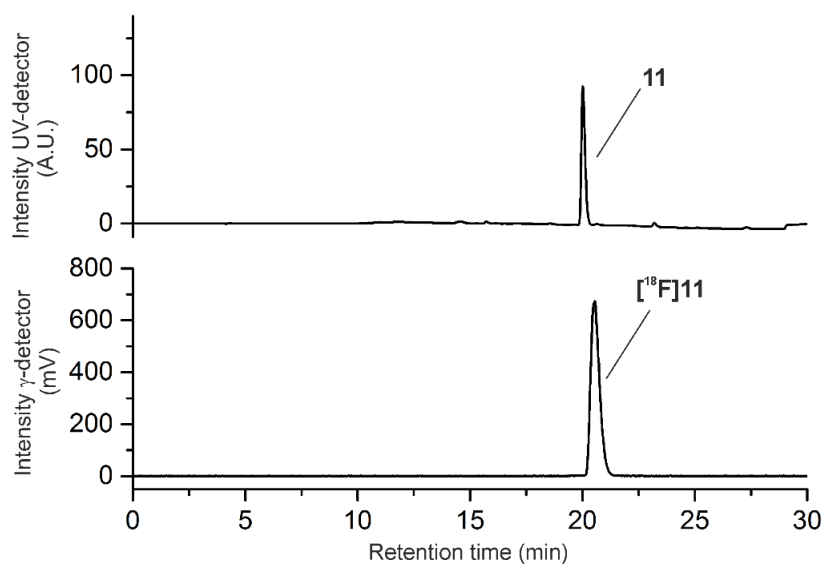

**Figure S13.** Exemplary UV- and radio-chromatogram of the final product of [ $^{18}\text{F}$ ]11 spiked with the nonradioactive reference compound 11. Conditions: Reprosil-Pur C18 AQ (250  $\times$  4.6 mm), gradient mode ACN/20 mM  $\text{NH}_4\text{OAc}_{\text{aq}}$ , flow 1.0 mL/min.



### 3) Biodistribution data of [ $^{18}\text{F}$ ]11 in mouse and rat

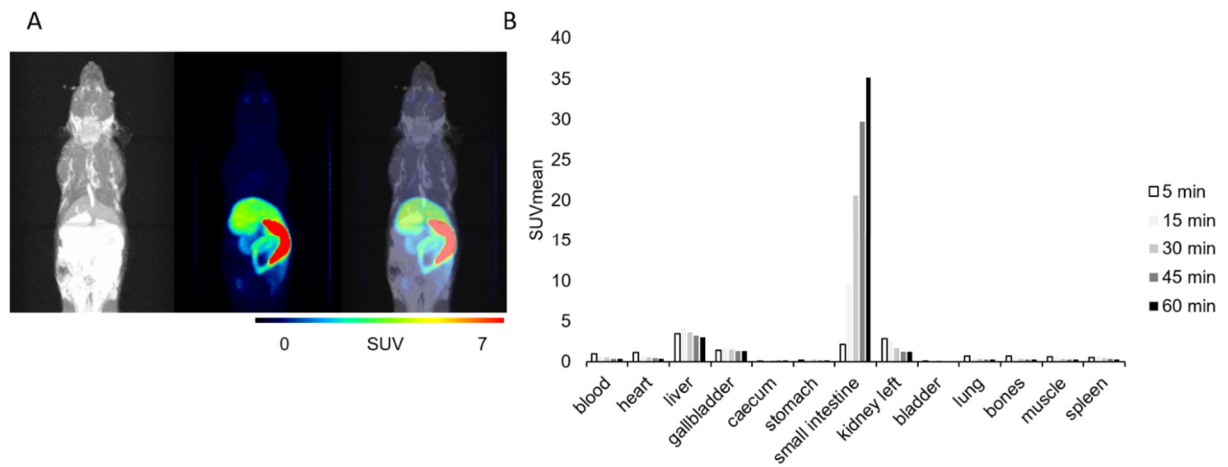

**Figure S14:** Maximal intensity projection [ $^{18}\text{F}$ ]11 after i.v. injection in a CD-1 mouse on MR, PET and PET/MR modalities (A). Biodistribution of [ $^{18}\text{F}$ ]11 at different time points derived from PET imaging uncorrected for metabolites (n = 1, SUV mean) (B).

**Table S1:** Tissue biodistribution of radioactivity at different time points after i.v. injection of [ $^{18}\text{F}$ ]11 in a CD-1 mouse based on PET data uncorrected for metabolites.

|                 | Uptake (SUVmean; n = 1) |        |        |        |        |
|-----------------|-------------------------|--------|--------|--------|--------|
|                 | 5 min                   | 15 min | 30 min | 45 min | 60 min |
| blood           | 0.93                    | 0.56   | 0.46   | 0.34   | 0.32   |
| heart           | 1.11                    | 0.65   | 0.52   | 0.37   | 0.35   |
| liver           | 3.40                    | 4.16   | 3.62   | 3.17   | 3.00   |
| gallbladder     | 1.41                    | 1.78   | 1.46   | 1.32   | 1.34   |
| caecum          | 0.10                    | 0.12   | 0.11   | 0.11   | 0.16   |
| stomach         | 0.15                    | 0.18   | 0.19   | 0.17   | 0.13   |
| small intestine | 2.10                    | 9.48   | 20.64  | 29.65  | 35.11  |
| kidney left     | 2.79                    | 2.37   | 1.61   | 1.18   | 1.17   |
| bladder         | 0.10                    | 0.08   | 0.10   | 0.07   | 0.06   |
| lung            | 0.65                    | 0.43   | 0.33   | 0.25   | 0.25   |
| bones           | 0.71                    | 0.47   | 0.31   | 0.23   | 0.20   |
| muscle          | 0.63                    | 0.49   | 0.35   | 0.26   | 0.21   |
| spleen          | 0.48                    | 0.59   | 0.45   | 0.30   | 0.24   |
